# Supplementary material
Source: Springer Nature journal article supplement (https://www.springermedizin.de/resource/supplementary/13012_2010_314_MOESM5_ESM.pdf/9629700)
Supplement: MOESM5 [file 9629700]

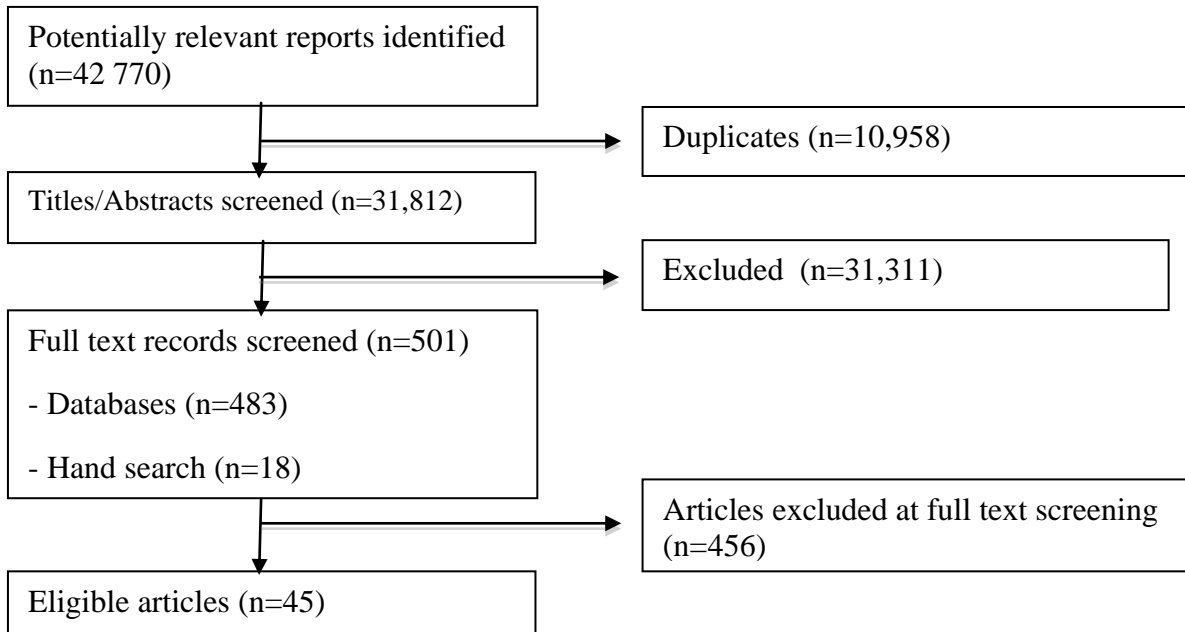

- 456 Excluded
- 40 Measure Sources of Knowledge
  - 223 Not Measure Research Use
  - 64 Adoption of Single Practice
  - 5 Population Not Health
  - 50 Guideline/Protocol Adherence
  - 7 Non-English
  - 35 Non nurses
